# Supplementary material for: Studies on apparent molar volumes and heat capacities of several pluronics (triblock copolymers) in aqueous solutions of sodium dodecyl sulfate at 298.15 and 318.15 KElectronic supplementary information (ESI) available: Apparent molar properties of SDS in aqueous pluronic solutions at 298.15 and 318.15 K. See http://www.rsc.org/suppdata/cp/b3/b313717a/
Source: Royal Society of Chemistry journal article supplement (doi:10.1039/b313717a), 2004-01-01
Supplement: b313717a.pdf [file b313717a.pdf]

**Electronic Supplementary Information**

Density differences and apparent molar volumes of SDS, differences in volumic heat capacities and apparent molar heat capacities of SDS, molar volumes and heat capacities of transfer of pluronics in the water/pluronic/SDS solutions at 298.15 and 318.15 K.

| $m_{\text{SDS}}$                    | $10^6 \times \delta\rho$ | $V_{\phi, \text{SDS}}$            | $\Delta V_{\text{PLU}}$           | $10^6 \times \delta\rho$ | $V_{\phi, \text{SDS}}$            | $\Delta V_{\text{PLU}}$           | $10^3 \times \delta\sigma/\sigma$ | $C_{\phi, \text{SDS}}$              | $\Delta C_{\text{PLU}}$             |
|-------------------------------------|--------------------------|-----------------------------------|-----------------------------------|--------------------------|-----------------------------------|-----------------------------------|-----------------------------------|-------------------------------------|-------------------------------------|
| mol kg <sup>-1</sup>                | g cm <sup>-3</sup>       | cm <sup>3</sup> mol <sup>-1</sup> | cm <sup>3</sup> mol <sup>-1</sup> | g cm <sup>-3</sup>       | cm <sup>3</sup> mol <sup>-1</sup> | cm <sup>3</sup> mol <sup>-1</sup> |                                   | J K <sup>-1</sup> mol <sup>-1</sup> | J K <sup>-1</sup> mol <sup>-1</sup> |
| <b>298.15 K</b>                     |                          |                                   | <b>318.15 K</b>                   |                          |                                   | <b>298.15 K</b>                   |                                   |                                     |                                     |
| <b>L31</b>                          |                          |                                   |                                   |                          |                                   |                                   |                                   |                                     |                                     |
| $m_P = 0.01832 \text{ mol kg}^{-1}$ |                          |                                   |                                   |                          |                                   |                                   |                                   |                                     |                                     |
| $\rho_P = 0.999019$                 |                          |                                   | $\rho_P = 0.991586$               |                          |                                   | $C_{p,P} = 4.1675$                |                                   |                                     |                                     |
| 0.002330                            | 90                       | 249.94                            | 1.68                              | 107                      | 244.24                            | -0.32                             | 0.406                             | 1758                                | 90.2                                |
| 0.002854                            | 105                      | 251.77                            | 2.31                              | 128                      | 245.30                            | -0.24                             |                                   |                                     |                                     |
| 0.004143                            | 157                      | 250.65                            | 2.97                              | 191                      | 243.97                            | -0.72                             |                                   |                                     |                                     |
| 0.004963                            | 165                      | 255.31                            | 4.74                              | 239                      | 241.86                            | -1.49                             | 0.342                             | 1345                                | 93.8                                |
| 0.007576                            | 230                      | 258.19                            | 7.96                              | 368                      | 241.34                            | -2.70                             | 0.133                             | 1139                                | 79.4                                |
| 0.009899                            | 302                      | 258.02                            | 9.73                              | 452                      | 244.31                            | -2.16                             | -0.064                            | 1045                                | 72.4                                |
| 0.01483                             | 466                      | 257.06                            | 12.19                             | 613                      | 248.66                            | -0.38                             | -0.694                            | 873                                 | 79.1                                |
| 0.02029                             | 652                      | 256.30                            | 14.17                             | 784                      | 251.35                            | 1.55                              | -1.59                             | 741                                 | 42.5                                |
| 0.02475                             | 815                      | 255.46                            | 14.75                             | 930                      | 252.39                            | 2.46                              | -2.34                             | 666                                 | -1.8                                |
| 0.03499                             | 1168                     | 254.92                            | 16.52                             | 1276                     | 253.42                            | 3.25                              | -4.32                             | 543                                 | -152.1                              |
| 0.04965                             | 1702                     | 253.88                            | 18.17                             | 1791                     | 253.69                            | 3.44                              | -7.21                             | 445                                 | -385.6                              |
| 0.06499                             | 2268                     | 253.12                            | 19.34                             | 2337                     | 253.66                            | 2.81                              | -10.12                            | 394                                 | -606.0                              |
| 0.08005                             | 2837                     | 252.44                            | 20.42                             | 2884                     | 253.45                            | 1.86                              | -12.74                            | 374                                 | -763.0                              |
| 0.09943                             | 3567                     | 251.82                            | 21.42                             | 3593                     | 253.16                            | -0.24                             | -15.87                            | 367                                 | -905.8                              |
| 0.1247                              | 4485                     | 251.38                            |                                   | 4470                     | 253.23                            | -1.97                             | -19.30                            | 382                                 | -934.4                              |
| 0.1506                              | 5461                     | 250.86                            | 22.40                             | 5316                     | 253.14                            | -3.12                             | -22.52                            | 398                                 | -956.2                              |

Supplementary Material for PCCP  
This journal is © The Owner Societies 2004

| $m_{\text{SDS}}$                    | $10^6 \times \delta p$ | $V_{\phi, \text{SDS}}$            | $\Delta V_{\text{PLU}}$           | $10^6 \times \delta p$ | $V_{\phi, \text{SDS}}$            | $\Delta V_{\text{PLU}}$           | $10^3 \times \delta \sigma / \sigma$ | $C_{\phi, \text{SDS}}$              | $\Delta C_{\text{PLU}}$             |
|-------------------------------------|------------------------|-----------------------------------|-----------------------------------|------------------------|-----------------------------------|-----------------------------------|--------------------------------------|-------------------------------------|-------------------------------------|
| mol kg <sup>-1</sup>                | g cm <sup>-3</sup>     | cm <sup>3</sup> mol <sup>-1</sup> | cm <sup>3</sup> mol <sup>-1</sup> | g cm <sup>-3</sup>     | cm <sup>3</sup> mol <sup>-1</sup> | cm <sup>3</sup> mol <sup>-1</sup> |                                      | J K <sup>-1</sup> mol <sup>-1</sup> | J K <sup>-1</sup> mol <sup>-1</sup> |
| <b>298.15 K</b>                     |                        |                                   | <b>318.15 K</b>                   |                        |                                   | <b>298.15 K</b>                   |                                      |                                     |                                     |
| <b>L 35</b>                         |                        |                                   |                                   |                        |                                   |                                   |                                      |                                     |                                     |
| $m_P = 0.01061 \text{ mol kg}^{-1}$ |                        |                                   |                                   |                        |                                   |                                   |                                      |                                     |                                     |
| $\rho_P = 0.999572$                 |                        |                                   | $\rho_P = 0.992485$               |                        |                                   | $C_{p,P} = 4.1627$                |                                      |                                     |                                     |
| 0.002041                            | 81                     | 248.76                            | 2.32                              | 41                     | 270.16                            | 4.58                              | 0.307                                | 1662                                | 115.5                               |
| 0.006420                            | 226                    | 253.21                            | 8.83                              | 138                    | 268.70                            | 12.96                             | -0.036                               | 1031                                | 34.0                                |
| 0.008004                            | 276                    | 253.92                            | 11.01                             | 180                    | 267.68                            | 15.14                             | -0.181                               | 962                                 | 16.2                                |
| 0.009797                            | 332                    | 254.50                            | 13.27                             | 224                    | 267.29                            | 17.84                             | -0.389                               | 893                                 | -9.0                                |
| 0.01604                             | 550                    | 254.05                            | 17.46                             | 411                    | 264.44                            | 23.16                             | -1.29                                | 720                                 | -55.7                               |
| 0.02047                             | 706                    | 253.81                            | 19.55                             | 549                    | 263.19                            | 25.77                             | -2.01                                | 644                                 | -111.3                              |
| 0.02641                             | 918                    | 253.48                            | 21.14                             | 755                    | 261.34                            | 26.54                             | -3.03                                | 574                                 | -211.4                              |
| 0.02988                             | 1045                   | 253.24                            | 21.45                             | 856                    | 261.26                            | 28.60                             | -3.64                                | 542                                 | -279.2                              |
| 0.03464                             | 1222                   | 252.89                            | 21.45                             | 1034                   | 259.99                            | 27.35                             | -4.50                                | 507                                 | -380.4                              |
| 0.04041                             | 1427                   | 252.80                            | 22.47                             | 1238                   | 259.14                            | 26.77                             | -5.54                                | 476                                 | -498.1                              |
| 0.05016                             | 1797                   | 252.19                            | 23.39                             | 1581                   | 258.16                            | 25.94                             | -7.31                                | 435                                 | -707.4                              |
| 0.07549                             | 2746                   | 251.41                            | 25.76                             | 2475                   | 256.64                            | 26.31                             | -11.44                               | 403                                 | -1057                               |
| 0.1016                              | 3728                   | 250.84                            | 27.96                             | 3379                   | 255.93                            | 26.25                             | -15.21                               | 405                                 | -1208                               |
| 0.1442                              | 5424                   | 249.50                            |                                   | 4934                   | 254.56                            |                                   | -20.93                               | 412                                 | -1224                               |

|                                      |       |        |                    |      |        |                    |        |      |        |
|--------------------------------------|-------|--------|--------------------|------|--------|--------------------|--------|------|--------|
| <b>10 R 5</b>                        |       |        |                    |      |        |                    |        |      |        |
| $m_P = 0.009625 \text{ mol kg}^{-1}$ |       |        |                    |      |        |                    |        |      |        |
| $\rho_P = 0.999531$                  |       |        | $\rho_P = 0.99247$ |      |        | $C_{p,P} = 4.1621$ |        |      |        |
| 0.002317                             | 110   | 240.97 | 0.98               | 79   | 255.93 | 2.26               | 0.163  | 1295 | 57.0   |
| 256.99                               | 0.039 | 246.62 | 4.10               | 147  |        | 4.63               |        | 1062 | 21.3   |
| 0.007776                             | 305   | 249.18 | 8.05               | 252  | 257.60 | 8.05               | -0.427 | 807  | -114.2 |
| 0.009659                             | 374   | 249.67 | 9.64               | 310  | 257.90 | 9.94               | -0.684 | 743  | -166.1 |
| 0.01479                              | 556   | 250.75 | 13.26              | 463  | 258.67 | 14.98              | -1.31  | 673  | -165.0 |
| 0.01846                              | 688   | 251.04 | 15.15              | 572  | 258.96 | 18.12              | -1.84  | 629  | -184.3 |
| 0.02423                              | 896   | 251.28 | 17.01              | 767  | 258.23 | 19.77              | -2.64  | 590  | -208.7 |
| 0.02985                              | 1099  | 251.39 | 17.97              |      |        |                    | -3.48  | 557  | -263.3 |
| 0.03469                              | 1271  | 251.52 | 18.82              | 1113 | 257.71 | 21.99              | -4.18  | 540  | -299.7 |
| 0.0421                               | 1544  | 251.42 | 19.31              | 1359 | 257.44 | 22.87              | -5.34  | 512  | -394.7 |
| 0.05096                              | 1870  | 251.32 | 21.68              | 1655 | 257.17 | 23.88              | -6.60  | 499  | -444.1 |
| 0.07705                              | 2832  | 251.01 | 25.92              | 2542 | 256.42 | 27.88              | -10.65 | 458  | -738.4 |
| 0.09809                              | 3608  | 250.79 | 29.00              | 3265 | 255.93 | 28.48              | -13.80 | 443  | -916.8 |
| 0.1465                               | 5439  | 249.99 | 28.28              | 4933 | 255.11 | 23.85              | -20.52 | 436  | -1214  |

Supplementary Material for PCCP  
This journal is © The Owner Societies 2004

| $m_{\text{SDS}}$     | $10^6 \times \delta p$             | $V_{\phi, \text{SDS}}$            | $\Delta V_{\text{PLU}}$           | $10^6 \times \delta p$ | $V_{\phi, \text{SDS}}$            | $\Delta V_{\text{PLU}}$           | $10^3 \times \delta \sigma / \sigma$ | $C_{\phi, \text{SDS}}$              | $\Delta C_{\text{PLU}}$             |
|----------------------|------------------------------------|-----------------------------------|-----------------------------------|------------------------|-----------------------------------|-----------------------------------|--------------------------------------|-------------------------------------|-------------------------------------|
| mol kg <sup>-1</sup> | g cm <sup>-3</sup>                 | cm <sup>3</sup> mol <sup>-1</sup> | cm <sup>3</sup> mol <sup>-1</sup> | g cm <sup>-3</sup>     | cm <sup>3</sup> mol <sup>-1</sup> | cm <sup>3</sup> mol <sup>-1</sup> |                                      | J K <sup>-1</sup> mol <sup>-1</sup> | J K <sup>-1</sup> mol <sup>-1</sup> |
| <b>298.15 K</b>      |                                    |                                   | <b>318.15 K</b>                   |                        |                                   | <b>298.15 K</b>                   |                                      |                                     |                                     |
| <b>L 64</b>          | $m_P = 0.0035 \text{ mol kg}^{-1}$ |                                   |                                   |                        |                                   |                                   |                                      |                                     |                                     |
|                      | $\rho_P = 0.998268$                |                                   |                                   | $\rho_P = 0.991039$    |                                   |                                   | $C_{p,P} = 4.1721$                   |                                     |                                     |
| 0.001016             | 12                                 | 248.38                            | 3.64                              | 22                     | 268.93                            | 5.78                              | 0.601                                | 3504                                | 691.6                               |
| 0.001986             | 34                                 | 257.04                            | 11.80                             | 56                     | 262.26                            | 8.17                              | 0.844                                | 2845                                | 980.9                               |
| 0.002999             | 91                                 | 258.41                            | 15.63                             |                        |                                   |                                   | 0.956                                | 2407                                | 928.8                               |
| 0.003959             | 90                                 | 258.69                            | 24.36                             | 144                    | 253.92                            | 7.05                              | 0.866                                | 1992                                | 1017.1                              |
| 0.004969             | 143                                | 259.96                            | 28.58                             |                        |                                   |                                   | 0.795                                | 1751                                | 772.6                               |
| 0.007969             | 238                                | 258.85                            | 41.80                             |                        |                                   |                                   | 0.036                                | 1097                                | -10.6                               |
| 0.009966             | 300                                | 258.60                            | 49.67                             |                        |                                   |                                   | -0.645                               | 806                                 | -681.2                              |
| 0.01231              | 376                                | 255.77                            | 51.39                             | 531                    | 246.94                            | -7.05                             |                                      |                                     |                                     |
| 0.01241              | 406                                | 255.95                            | 48.81                             |                        |                                   |                                   |                                      |                                     |                                     |
| 0.01497              | 482                                | 256.45                            | 58.28                             | 665                    | 245.59                            | -12.01                            | -2.06                                | 492                                 | -1397                               |
| 0.01997              | 650                                | 254.59                            | 64.08                             | 828                    | 248.56                            | -8.66                             | -3.14                                | 400                                 | -1795                               |
| 0.02457              | 840                                | 254.36                            | 62.90                             |                        |                                   |                                   |                                      |                                     |                                     |
| 0.03675              | 1370                               | 249.95                            | 39.24                             | 1480                   | 249.39                            | -26.01                            | -6.00                                | 353                                 | -2869                               |
| 0.05226              | 1943                               | 250.26                            | 48.69                             | 2026                   | 250.85                            | -28.37                            | -8.12                                | 386                                 | -3001                               |
| 0.079254             | 2984                               | 249.81                            | 48.76                             | 2990                   | 251.71                            | -29.37                            | -11.57                               | 419                                 | -2997                               |
| 0.10626              | 4038                               | 249.33                            | 45.46                             | 3944                   | 252.12                            |                                   | -14.90                               | 438                                 | -2799                               |
| 0.1377               | 5229                               | 249.12                            | 42.49                             | 5025                   | 252.46                            | -34.50                            | -18.34                               | 463                                 | -2247                               |
| 0.15755              | 5942                               | 249.28                            | 52.35                             |                        |                                   | -42.08                            | -20.86                               | 464                                 | -2275                               |
| 0.1938               | 7216                               | 249.46                            | 43.20                             | 6838                   | 253.25                            | -34.85                            | -24.77                               | 480                                 | -1910                               |
| <b>L64</b>           | $m_P = 0.007 \text{ mol.kg}^{-1}$  |                                   |                                   |                        |                                   |                                   |                                      |                                     |                                     |
|                      | $\rho_P = 0.999445$                |                                   |                                   | $\rho_P = 0.991795$    |                                   |                                   | $C_{p,P} = 4.16613$                  |                                     |                                     |
| 0.00316              | 5                                  | 285.05                            | 21.65                             | 45                     | 276.28                            | 13.28                             | 2.60                                 | 4636                                | 1692                                |
| 0.005146             | 80                                 | 271.79                            | 24.70                             | 162                    | 258.72                            | 8.21                              | 3.01                                 | 3582                                | 1946                                |
| 0.007346             | 153                                | 268.74                            | 29.30                             | 281                    | 251.81                            | 4.14                              | 2.86                                 | 2744                                | 1898                                |
| 0.009957             | 241                                | 263.64                            | 32.98                             | 416                    | 248.19                            | -0.67                             | 2.41                                 | 2116                                | 1715                                |
| 0.01475              | 379                                | 263.26                            | 42.34                             | 636                    | 246.77                            | -5.55                             | 0.667                                | 1285                                | 1154                                |
| 0.02153              | 564                                | 261.89                            | 54.51                             | 879                    | 249.04                            | -4.66                             | -1.76                                | 751                                 | 248.1                               |
| 0.03121              | 919                                | 258.63                            | 55.87                             | 1278                   | 248.82                            | -13.21                            | -4.75                                | 440                                 | -828.9                              |
| 0.04114              | 1362                               | 254.90                            | 47.03                             | 1717                   | 247.91                            | -28.05                            | -7.12                                | 334                                 | -1562                               |
| 0.05481              | 1881                               | 253.85                            | 47.91                             | 2226                   | 248.92                            | -33.39                            | -9.46                                | 328                                 | -1925                               |
| 0.06984              | 2435                               | 253.13                            | 48.32                             | 2746                   | 250.10                            | -32.10                            | -11.72                               | 336                                 | -2115                               |
| 0.0847               | 3005                               | 252.36                            | 48.53                             | 3204                   | 251.50                            | -23.53                            | -13.87                               | 358                                 | -2248                               |
| 0.1005               | 3605                               | 251.80                            | 48.71                             | 3787                   | 251.26                            | -33.12                            | -15.98                               | 369                                 | -2357                               |
| 0.1505               | 5406                               | 251.27                            | 47.53                             | 5510                   | 252.15                            | -39.18                            | -22.26                               | 406                                 | -2391                               |

Supplementary Material for PCCP  
 This journal is © The Owner Societies 2004

| $m_{\text{SDS}}$                    | $10^6 \times \delta p$ | $V_{\phi, \text{SDS}}$        | $\Delta V_{\text{PLU}}$       | $10^6 \times \delta p$ | $V_{\phi, \text{SDS}}$        | $\Delta V_{\text{PLU}}$       | $10^3 \times \delta \sigma / \sigma$ | $C_{\phi, \text{SDS}}$            | $\Delta C_{\text{PLU}}$           |
|-------------------------------------|------------------------|-------------------------------|-------------------------------|------------------------|-------------------------------|-------------------------------|--------------------------------------|-----------------------------------|-----------------------------------|
| $\text{mol kg}^{-1}$                | $\text{g cm}^{-3}$     | $\text{cm}^3 \text{mol}^{-1}$ | $\text{cm}^3 \text{mol}^{-1}$ | $\text{g cm}^{-3}$     | $\text{cm}^3 \text{mol}^{-1}$ | $\text{cm}^3 \text{mol}^{-1}$ |                                      | $\text{J K}^{-1} \text{mol}^{-1}$ | $\text{J K}^{-1} \text{mol}^{-1}$ |
| <b>298.15 K</b>                     |                        |                               | <b>318.15 K</b>               |                        |                               | <b>298.15 K</b>               |                                      |                                   |                                   |
| <b>F 68</b>                         |                        |                               |                               |                        |                               |                               |                                      |                                   |                                   |
| $m_p = 0.00024 \text{ mol kg}^{-1}$ |                        |                               |                               |                        |                               |                               |                                      |                                   |                                   |
| $\rho_p = 1.000003$                 |                        |                               | $\rho_p = 0.992913$           |                        |                               | $c_{p,P} = 4.1581$            |                                      |                                   |                                   |
| 0.002043                            | 79                     | 249.68                        | 11.2                          | 33                     | 274.28                        | 23.1                          | 0.304                                | 1658                              | 513.6                             |
| 0.003120                            | 96                     | 257.58                        | 29.0                          | 64                     | 276.32                        | 37.7                          | 0.209                                | 1350                              | 404.9                             |
| 0.004119                            | 146                    | 252.89                        | 26.5                          | 89                     | 268.80                        | 36.1                          | 0.071                                | 1123                              | 173.7                             |
| 0.005217                            | 183                    | 253.24                        | 35.4                          | 126                    | 266.25                        | 39.5                          | -0.131                               | 949                               | -115.5                            |
| 0.006369                            | 211                    | 255.18                        | 44.5                          | 162                    | 264.95                        | 44.0                          | -0.314                               | 856                               | -326.2                            |
| 0.008254                            | 281                    | 254.24                        | 51.5                          | 223                    | 263.35                        | 50.1                          | -0.711                               | 698                               | -835.3                            |
| 0.01066                             | 381                    | 252.51                        | 53.8                          | 292                    | 262.95                        | 60.9                          | -1.30                                | 543                               | -1557                             |
| 0.01331                             | 479                    | 252.24                        | 59.1                          | 406                    | 259.80                        | 55.4                          | -1.81                                | 481                               | -1862                             |
| 0.01797                             | 657                    | 251.55                        | 64.6                          | 574                    | 258.31                        | 57.5                          | -2.69                                | 422                               | -2352                             |
| 0.02113                             | 780                    | 251.21                        | 65.9                          | 687                    | 257.70                        | 58.0                          | -3.07                                | 438                               | -2318                             |
| 0.02628                             | 974                    | 251.00                        | 69.3                          | 869                    | 257.09                        | 57.7                          | -3.79                                | 440                               | -2449                             |
| 0.03112                             | 1167                   | 250.50                        | 62.1                          | 1043                   | 256.58                        | 54.4                          | -4.34                                | 457                               | -2360                             |
| 0.03396                             | 1255                   | 251.02                        | 69.4                          | 1127                   | 257.21                        | 64.5                          | -4.82                                | 449                               | -2538                             |
| 0.04229                             | 1593                   | 250.19                        | 57.9                          | 1432                   | 256.11                        |                               | -5.83                                | 462                               | -2495                             |
| 0.04860                             | 1830                   | 250.13                        | 61.3                          | 1648                   | 256.22                        | 64.8                          | -6.66                                | 464                               | -2535                             |
| 0.07422                             | 2795                   | 249.81                        | 69.5                          | 2520                   | 255.82                        | 80.0                          | -9.99                                | 470                               | -2576                             |
| 0.09890                             | 3704                   | 249.72                        | 86.6                          | 3357                   | 255.52                        | 86.9                          | -13.56                               | 455                               | -3193                             |
| 0.1475                              | 5477                   | 249.47                        |                               | 4980                   | 255.14                        | 88.4                          | -19.68                               | 464                               | -3140                             |

| $m_{\text{SDS}}$                     | $10^6 \times \delta p$ | $V_{\phi, \text{SDS}}$        | $\Delta V_{\text{PLU}}$       | $10^6 \times \delta p$ | $V_{\phi, \text{SDS}}$        | $\Delta V_{\text{PLU}}$       | $10^3 \times \delta \sigma / \sigma$ | $C_{\phi, \text{SDS}}$            | $\Delta C_{\text{PLU}}$           |
|--------------------------------------|------------------------|-------------------------------|-------------------------------|------------------------|-------------------------------|-------------------------------|--------------------------------------|-----------------------------------|-----------------------------------|
| $\text{mol kg}^{-1}$                 | $\text{g cm}^{-3}$     | $\text{cm}^3 \text{mol}^{-1}$ | $\text{cm}^3 \text{mol}^{-1}$ | $\text{g cm}^{-3}$     | $\text{cm}^3 \text{mol}^{-1}$ | $\text{cm}^3 \text{mol}^{-1}$ |                                      | $\text{J K}^{-1} \text{mol}^{-1}$ | $\text{J K}^{-1} \text{mol}^{-1}$ |
| <b>298.15 K</b>                      |                        |                               | <b>318.15 K</b>               |                        |                               | <b>298.15 K</b>               |                                      |                                   |                                   |
| <b>P 123</b>                         |                        |                               |                               |                        |                               |                               |                                      |                                   |                                   |
| $m_P = 0.001731 \text{ mol kg}^{-1}$ |                        |                               |                               |                        |                               |                               |                                      |                                   |                                   |
| $\rho_P = 0.997869$                  |                        |                               | $\rho_P = 0.990823$           |                        |                               | $C_{p,P} = 4.2098$            |                                      |                                   |                                   |
| 0.002662                             | 131                    | 239.54                        | 3.75                          | 122                    | 244.34                        | -3.79                         | -5.63                                | -7906                             | -13919                            |
| 0.005065                             | 300                    | 229.44                        | -25.83                        | 234                    | 243.93                        | -9.88                         | -5.18                                | -3343                             | -12851                            |
| 0.007154                             | 428                    | 228.82                        | -42.95                        |                        |                               |                               | -5.52                                | -2342                             | -13581                            |
| 0.009881                             | 576                    | 230.32                        | -57.58                        | 482                    | 241.25                        | -40.2                         | -8.82                                | -2798                             | -21336                            |
| 0.01482                              | 791                    | 235.21                        | -60.91                        | 730                    | 240.70                        | -72.5                         | -10.96                               | -2137                             | -25230                            |
| 0.01945                              | 984                    | 237.95                        | -62.92                        | 947                    | 241.23                        | -97.6                         | -12.02                               | -1614                             | -26415                            |
| 0.02476                              | 1196                   | 240.20                        | -65.21                        | 1171                   | 242.59                        | -115.3                        | -13.09                               | -1230                             | -27441                            |
| 0.03559                              | 1633                   | 242.52                        | -82.07                        | 1589                   | 245.18                        | -137                          | -14.40                               | -699                              | -27407                            |
| 0.04991                              | 2214                   | 243.91                        | -99.20                        | 2123                   | 247.19                        | -160.3                        | -16.39                               | -374                              | -27930                            |
| 0.06493                              | 2801                   | 244.98                        | -105.70                       | 2661                   | 248.64                        | -160.7                        | -18.16                               | -167                              | -27649                            |
| 0.07980                              | 3375                   | 245.69                        | -100.49                       | 3185                   | 249.59                        | -159.6                        | -20.03                               | -45                               | -27547                            |
| 0.1001                               | 4146                   | 246.38                        | -91.79                        | 3895                   | 250.43                        | -161.8                        | -22.56                               | 63                                | -27335                            |
| 0.1316                               | 5312                   | 247.14                        |                               | 4928                   | 251.66                        | -138.4                        | -25.97                               | 181                               | -25792                            |
| 0.1879                               | 7404                   | 247.59                        | -83.52                        | 6817                   | 252.36                        | -161.7                        | -32.41                               | 280                               | -25357                            |
